# Supplementary material for: Detection of SARS-CoV-2 in Wastewater Associated with Scientific Stations in Antarctica and Possible Risk for Wildlife
Source: MDPI journal article supplement (doi:10.3390/microorganisms12040743), 2024-04-06
Supplement: s1 [file s1]

**Supplementary table S1: Primers used in this study**

|                      | <b>Sequence</b>                  | <b>Type</b> |
|----------------------|----------------------------------|-------------|
| N <sub>1</sub> F     | GACCCCAAAATCAGCGAAAT             | Forward     |
| N <sub>1</sub> R     | TCTGGTTACTGCCAGTTGAATCTG         | Reverse     |
| Probe N <sub>1</sub> | FAM-ACCCCGCATTACGTTTGGTGGACC-BH1 |             |
| N <sub>2</sub> F     | TTACAAACATTGGCCGCAA              | Forward     |
| N <sub>2</sub> R     | GCGCGACATTCCGAAGAA               | Reverse     |
| Probe N <sub>2</sub> | FAM-ACAATTTGCCCCCAGCGCTTCAG-BHQ1 |             |
| RNAsaPF              | AGATTTGGACCTGCGAGCG              | Forward     |
| RNAsaPR              | GAGCGGCTGTCTCCACAAGT             | Reverse     |
| Probe<br>RNAsaP      | FAM-TTCTGACCTGAAGGCTCTGCGCG-BHQ1 |             |
